# Supplementary material for: Using flow cytometry and light-induced fluorescence to characterize the variability and characteristics of bioaerosols in springtime in Metro Atlanta, Georgia
Source: Copernicus journal article supplement (doi:10.5194/acp-20-1817-2020), 2020-02-14
Supplement: Supplementary file 1 [file acp-20-1817-2020-supplement.zip]

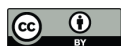

## *Supplement of*

# **Using flow cytometry and light-induced fluorescence to characterize the variability and characteristics of bioaerosols in springtime in Metro Atlanta, Georgia**

**Arnaldo Negron et al.**

*Correspondence to:* Konstantinos T. Konstantinidis ([kostas.konstantinidis@gatech.edu](mailto:kostas.konstantinidis@gatech.edu))  
and Athanasios Nenes ([athanasios.nenes@epfl.ch](mailto:athanasios.nenes@epfl.ch))

- [acp-20-1817-2020-supplement-title-page.pdf](#)
- [PBAP\\_FCM\\_sup\\_16\\_proofread.docx](#)
- Supplemental\_Data
  - .DS\_Store
  - FCM\_threshold\_values
    - \* FCM\_Threshold\_calculation.csv
  - Figure 2
    - \* .DS\_Store
    - \* csv files
    - \* fcs file
  - Figure 3
    - \* Figure3.xlsx
  - Figure 4
    - \* Figure 4.xlsx
  - Figure 5
    - \* Figure5.xlsx
  - Figure 6
    - \* .DS\_Store
    - \* Figure 6a
    - \* Figure 6b
    - \* Figure 6c
  - Figure 7
    - \* .DS\_Store

- \* Figure 7a
- \* Figure 7b
- \* Figure 7c
- Figure 8
  - \* Figure8.xlsx
- readme.txt

The copyright of individual parts of the supplement might differ from the CC BY 4.0 License.
